# Supplementary material for: Introduction to Computational Proteomics
Source: PLoS Comput Biol. 2007 Jul 27;3(7):e114. doi: 10.1371/journal.pcbi.0030114 (PMC1933459; doi:10.1371/journal.pcbi.0030114)
Supplement: Text S4 — An example mass list for PMF searching (in pkl format, SWISS-PROT ID: ENO_YEAST). (1 KB TXT) [file pcbi.0030114.sd004.txt]

866.029113769531	1061.35888671875	1
1037.44287109375	1302.92211914063	1
1100.54064941406	1970.16088867188	1
1159.62670898437	2626.43359375	1
1224.60290527344	3392.50805664063	1
1286.72729492187	4825.58349609375	1
1287.72387695312	5058.560546875	1
1288.72143554687	4416.6328125	1
1374.64904785156	7149.34814453125	1
1412.82604980469	1320.5849609375	1
1416.74890136719	1651.49645996094	1
1455.705078125	1346.17883300781	1
1578.82678222656	1598.80810546875	1
1755.90344238281	1972.37878417969	1
1792.95678710937	2710.98168945312	1
1795.28784179688	829.803039550781	1
1840.96020507812	2481.56298828125	1
1868.96960449219	933.735229492187	1
1884.9384765625	827.942810058594	1
2163.08422851563	331.158416748047	1
2165.11181640625	375.930938720703	1
2328.0986328125	485.306762695313	1
2441.1650390625	2900.48022460937	1
2499.13818359375	252.227661132813	1
